# Supplementary material for: Prevalence of Micronutrient Deficiencies in Patients Hospitalized with COVID-19: An Observational Cohort Study
Source: MDPI journal article supplement (doi:10.3390/nu14091862), 2022-04-29
Supplement: s1 [file s1]

**Table S1.** Cut-off values for different micronutrients

| Parameter   | Cut-off       |
|-------------|---------------|
| Vitamin A   | < 1.0 µmol/l  |
| Vitamin B12 | < 140 pmol/l  |
| Vitamin D   | < 30.0 nmol/l |
| Vitamin E   | < 11.6 µmol/l |
| Folic acid  | < 7.0 nmol/l  |
| Zinc        | < 10.1 µmol/l |
| Selenium    | < 0.94 µmol/l |
| Copper      | < 11.8 µmol/l |

Cut-off values were based on the reference range of the laboratory at the Cantonal Hospital Aarau, whereas the cut-off value for vitamin D was according to Munns [1].

1. Munns, C.F.; Shaw, N.; Kiely, M.; Specker, B.L.; Thacher, T.D.; Ozono, K.; Michigami, T.; Tiosano, D.; Mughal, M.Z.; Mäkitie, O.; et al. Global Consensus Recommendations on Prevention and Management of Nutritional Rickets. *J. Clin. Endocrinol. Metab.* **2016**, *101*, 394–415.
